# Supplementary material
Source: ML conference proceedings conference paper supplement (https://openaccess.thecvf.com/content/CVPR2023/html/Potje_Enhancing_Deformable_Local_CVPR_2023_paper.html)
Supplement: Supplementary file 2 [file Potje_Enhancing_Deformable_Local_CVPR_2023_supplemental.zip]

Archive with 2 entries (2 files):
- CVPR23_DALF_supplementary_material.pdf
- registration_visual_results.mp4
